# Supplementary material for: A proteome-wide immuno-mass spectrometric identification of serum autoantibodies
Source: Clin Proteomics. 2019 Jun 20;16:25. doi: 10.1186/s12014-019-9246-0 (PMC6585069; doi:10.1186/s12014-019-9246-0)
Supplement: Supplementary file 3 — Additional file 3: Table S3. Mass spectrometry data of experiment with 25 µl of negative serum and 100 µg of pancreatic lysate. Mass spectrometry run 1. [file 12014_2019_9246_MOESM3_ESM.xlsx]

## Sheet: Sheet1
Accession	Description	Score	Coverage	# Proteins	# Unique Peptides	# Peptides	# PSMs	Area	# AAs	MW [kDa]	calc. pI
P01857	Immunoglobulin heavy constant gamma 1 OS=Homo sapiens GN=IGHG1 PE=1 SV=1 - [IGHG1_HUMAN]	543.598	63.94	1	9	19	283	1.35686e+11	330	36.0832	8.19189
P02768	Serum albumin OS=Homo sapiens GN=ALB PE=1 SV=2 - [ALBU_HUMAN]	506.663	76.68	3	52	52	222	2.56155e+10	609	69.3215	6.27783
P01834	Immunoglobulin kappa constant OS=Homo sapiens GN=IGKC PE=1 SV=2 - [IGKC_HUMAN]	404.382	82.24	1	8	8	226	1.16992e+11	107	11.7578	6.52197
P01860	Immunoglobulin heavy constant gamma 3 OS=Homo sapiens GN=IGHG3 PE=1 SV=2 - [IGHG3_HUMAN]	391.28	57.56	1	7	19	182	1.37175e+11	377	41.2604	7.89893
P01861	Immunoglobulin heavy constant gamma 4 OS=Homo sapiens GN=IGHG4 PE=1 SV=1 - [IGHG4_HUMAN]	301.245	55.35	1	5	13	146	1.26056e+11	327	35.9179	7.35693
P01859	Immunoglobulin heavy constant gamma 2 OS=Homo sapiens GN=IGHG2 PE=1 SV=2 - [IGHG2_HUMAN]	262.792	62.27	1	9	19	134	8.63721e+10	326	35.8778	7.59131
B9A064	Immunoglobulin lambda-like polypeptide 5 OS=Homo sapiens GN=IGLL5 PE=2 SV=2 - [IGLL5_HUMAN]	165.345	38.32	2	2	6	68	31259285531	214	23.0486	8.83643
P0DOY2	Immunoglobulin lambda constant 2 OS=Homo sapiens GN=IGLC2 PE=1 SV=1 - [IGLC2_HUMAN]	157.859	85.85	2	2	7	69	4.15321e+10	106	11.2865	7.23975
P0CF74	Immunoglobulin lambda constant 6 OS=Homo sapiens GN=IGLC6 PE=1 SV=1 - [IGLC6_HUMAN]	148.284	66.98	1	1	5	62	4.15321e+10	106	11.2695	7.23975
P01023	Alpha-2-macroglobulin OS=Homo sapiens GN=A2M PE=1 SV=3 - [A2MG_HUMAN]	121.185	35.21	3	35	35	48	5.21383e+08	1474	163.188	6.45557
A0M8Q6	Immunoglobulin lambda constant 7 OS=Homo sapiens GN=IGLC7 PE=1 SV=3 - [IGLC7_HUMAN]	119.583	46.23	1	1	4	51	2.77447e+10	106	11.2466	8.29443
P02787	Serotransferrin OS=Homo sapiens GN=TF PE=1 SV=3 - [TRFE_HUMAN]	97.9941	43.41	1	29	29	40	9.43706e+08	698	77.0136	7.12256
P0C0L5	Complement C4-B OS=Homo sapiens GN=C4B PE=1 SV=2 - [CO4B_HUMAN]	94.4903	20.7	1	3	29	36	6.67835e+08	1744	192.631	7.26904
P01024	Complement C3 OS=Homo sapiens GN=C3 PE=1 SV=2 - [CO3_HUMAN]	93.9349	23.69	1	35	35	39	4.39647e+08	1663	187.03	6.40479
P0C0L4-2	Isoform 2 of Complement C4-A OS=Homo sapiens GN=C4A - [CO4A_HUMAN]	92.4351	20.97	2	3	29	36	6.67835e+08	1698	187.586	7.12256
P01876	Immunoglobulin heavy constant alpha 1 OS=Homo sapiens GN=IGHA1 PE=1 SV=2 - [IGHA1_HUMAN]	66.8814	54.39	2	13	13	22	4.05278e+09	353	37.6306	6.50732
P01871	Immunoglobulin heavy constant mu OS=Homo sapiens GN=IGHM PE=1 SV=4 - [IGHM_HUMAN]	62.3174	39.29	2	14	14	29	1.72686e+09	453	49.4086	6.771
P08603	Complement factor H OS=Homo sapiens GN=CFH PE=1 SV=4 - [CFAH_HUMAN]	49.6357	23.72	4	20	20	22	8.57564e+07	1231	139.005	6.60986
P02790	Hemopexin OS=Homo sapiens GN=HPX PE=1 SV=2 - [HEMO_HUMAN]	46.822	38.96	1	14	14	19	4.64165e+08	462	51.6433	7.02002
P00738	Haptoglobin OS=Homo sapiens GN=HP PE=1 SV=1 - [HPT_HUMAN]	43.824	36.7	2	6	14	16	7.46088e+08	406	45.1766	6.58057
P01619	Immunoglobulin kappa variable 3-20 OS=Homo sapiens GN=IGKV3-20 PE=1 SV=2 - [KV320_HUMAN]	40.3768	46.55	1	2	4	13	7.82428e+09	116	12.5493	4.95752
P01780	Immunoglobulin heavy variable 3-7 OS=Homo sapiens GN=IGHV3-7 PE=1 SV=2 - [HV307_HUMAN]	38.5084	37.61	4	3	5	20	7537456337	117	12.9344	6.56592
P0DP03	Immunoglobulin heavy variable 3-30-5 OS=Homo sapiens GN=IGHV3-30-5 PE=3 SV=1 - [HV335_HUMAN]	37.226	35.04	2	2	3	13	3.76774e+09	117	12.9384	8.92432
Q9Y6R7	IgGFc-binding protein OS=Homo sapiens GN=FCGBP PE=1 SV=3 - [FCGBP_HUMAN]	36.8229	6.35	1	14	14	17	5.91887e+07	5405	571.639	5.33838
P06312	Immunoglobulin kappa variable 4-1 OS=Homo sapiens GN=IGKV4-1 PE=1 SV=1 - [KV401_HUMAN]	35.8969	29.75	1	3	3	13	1.90544e+09	121	13.3716	5.24951
A0A0C4DH42	Immunoglobulin heavy variable 3-66 OS=Homo sapiens GN=IGHV3-66 PE=3 SV=1 - [HV366_HUMAN]	35.6542	35.34	3	1	3	14	5.92895e+09	116	12.6903	8.1626
A0A0B4J1X5	Immunoglobulin heavy variable 3-74 OS=Homo sapiens GN=IGHV3-74 PE=3 SV=1 - [HV374_HUMAN]	35.0438	31.62	2	1	3	14	5.95061e+09	117	12.8314	8.66064
P01782	Immunoglobulin heavy variable 3-9 OS=Homo sapiens GN=IGHV3-9 PE=1 SV=2 - [HV309_HUMAN]	32.9229	34.75	3	2	3	15	2.34421e+09	118	12.9364	7.07861
A0A0B4J1V1	Immunoglobulin heavy variable 3-21 OS=Homo sapiens GN=IGHV3-21 PE=1 SV=1 - [HV321_HUMAN]	32.5184	35.04	4	1	3	15	7924996414	117	12.8314	8.27979
A0A0C4DH38	Immunoglobulin heavy variable 5-51 OS=Homo sapiens GN=IGHV5-51 PE=3 SV=1 - [HV551_HUMAN]	32.3375	47.01	2	4	4	15	1.71609e+09	117	12.6663	8.26514
P01763	Immunoglobulin heavy variable 3-48 OS=Homo sapiens GN=IGHV3-48 PE=1 SV=2 - [HV348_HUMAN]	32.2966	35.04	4	1	3	15	5.30453e+09	117	12.8043	5.36377
P00450	Ceruloplasmin OS=Homo sapiens GN=CP PE=1 SV=1 - [CERU_HUMAN]	30.5804	15.59	1	13	13	16	2.08048e+08	1065	122.128	5.71924
P04264	Keratin, type II cytoskeletal 1 OS=Homo sapiens GN=KRT1 PE=1 SV=6 - [K2C1_HUMAN]	27.8003	23.6	2	11	13	14	1.23107e+08	644	65.999	8.11865
P00739	Haptoglobin-related protein OS=Homo sapiens GN=HPR PE=2 SV=2 - [HPTR_HUMAN]	27.6298	33.05	2	2	10	11	3.81881e+08	348	39.0047	7.09326
P68871	Hemoglobin subunit beta OS=Homo sapiens GN=HBB PE=1 SV=2 - [HBB_HUMAN]	27.3591	68.03	4	4	8	11	5.51823e+08	147	15.9883	7.28369
A0A0B4J1X8	Immunoglobulin heavy variable 3-43 OS=Homo sapiens GN=IGHV3-43 PE=3 SV=1 - [HV343_HUMAN]	26.5409	18.64	2	1	2	12	2869696944	118	13.0684	5.41455
O43866	CD5 antigen-like OS=Homo sapiens GN=CD5L PE=1 SV=1 - [CD5L_HUMAN]	25.7407	31.41	1	7	7	9	1.04479e+08	347	38.0629	5.46533
P01766	Immunoglobulin heavy variable 3-13 OS=Homo sapiens GN=IGHV3-13 PE=1 SV=2 - [HV313_HUMAN]	24.7227	18.97	2	1	2	12	2.99365e+09	116	12.4982	7.07861
A0A0C4DH25	Immunoglobulin kappa variable 3D-20 OS=Homo sapiens GN=IGKV3D-20 PE=3 SV=1 - [KVD20_HUMAN]	24.0949	27.59	1	1	3	8	3.45006e+09	116	12.5072	4.58936
A0A0A0MRZ8	Immunoglobulin kappa variable 3D-11 OS=Homo sapiens GN=IGKV3D-11 PE=3 SV=6 - [KVD11_HUMAN]	23.8194	26.09	2	2	2	8	4918936253	115	12.6173	5.2876
P04432	Immunoglobulin kappa variable 1D-39 OS=Homo sapiens GN=IGKV1D-39 PE=3 SV=2 - [KVD39_HUMAN]	23.4296	29.06	1	1	2	10	383691178	117	12.7293	8.66064
P80748	Immunoglobulin lambda variable 3-21 OS=Homo sapiens GN=IGLV3-21 PE=1 SV=2 - [LV321_HUMAN]	23.1244	48.72	2	1	3	8	6.05709e+08	117	12.438	5.2876
A0A0C4DH73	Immunoglobulin kappa variable 1-12 OS=Homo sapiens GN=IGKV1-12 PE=3 SV=1 - [KV112_HUMAN]	21.9028	29.06	2	1	2	9	3.67158e+08	117	12.6373	8.30908
P01742	Immunoglobulin heavy variable 1-69 OS=Homo sapiens GN=IGHV1-69 PE=1 SV=2 - [HV169_HUMAN]	21.4313	54.7	4	3	4	12	9.62627e+08	117	12.6513	9.17334
A0A0B4J1Y9	Immunoglobulin heavy variable 3-72 OS=Homo sapiens GN=IGHV3-72 PE=3 SV=1 - [HV372_HUMAN]	20.4481	35.29	1	3	4	9	3.30555e+09	119	13.1945	7.85498
P04196	Histidine-rich glycoprotein OS=Homo sapiens GN=HRG PE=1 SV=1 - [HRG_HUMAN]	19.4231	21.33	1	9	9	10	2.23007e+08	525	59.5409	7.50342
A0A075B6K5	Immunoglobulin lambda variable 3-9 OS=Homo sapiens GN=IGLV3-9 PE=3 SV=1 - [LV39_HUMAN]	18.8614	33.04	2	1	3	7	5.54731e+08	115	12.3241	7.38623
P02647	Apolipoprotein A-I OS=Homo sapiens GN=APOA1 PE=1 SV=1 - [APOA1_HUMAN]	18.4261	35.96	1	9	9	10	6.92749e+07	267	30.7589	5.75732
P69905	Hemoglobin subunit alpha OS=Homo sapiens GN=HBA1 PE=1 SV=2 - [HBA_HUMAN]	18.3246	57.04	1	5	5	8	3.17684e+08	142	15.2479	8.67529
P35527	Keratin, type I cytoskeletal 9 OS=Homo sapiens GN=KRT9 PE=1 SV=3 - [K1C9_HUMAN]	17.5577	9.15	1	5	5	7	4.02551e+07	623	62.0268	5.23682
P02749	Beta-2-glycoprotein 1 OS=Homo sapiens GN=APOH PE=1 SV=3 - [APOH_HUMAN]	17.0172	26.67	1	6	6	8	9.00686e+07	345	38.2727	7.97217
P0DP08	Immunoglobulin heavy variable 4-38-2 OS=Homo sapiens GN=IGHV4-38-2 PE=3 SV=1 - [HVD82_HUMAN]	16.793	31.62	9	2	2	6	3.80425e+08	117	13.0077	9.29053
P02042	Hemoglobin subunit delta OS=Homo sapiens GN=HBD PE=1 SV=2 - [HBD_HUMAN]	16.1252	48.3	4	2	6	7	3.7977e+08	147	16.0453	8.04541
P35908	Keratin, type II cytoskeletal 2 epidermal OS=Homo sapiens GN=KRT2 PE=1 SV=2 - [K22E_HUMAN]	15.9316	12.21	7	5	7	7	9.28012e+07	639	65.3932	8.00146
P02760	Protein AMBP OS=Homo sapiens GN=AMBP PE=1 SV=1 - [AMBP_HUMAN]	15.7151	23.58	1	6	6	8	6.39069e+07	352	38.974	6.25244
P19652	Alpha-1-acid glycoprotein 2 OS=Homo sapiens GN=ORM2 PE=1 SV=2 - [A1AG2_HUMAN]	15.5473	23.88	1	3	4	6	7.02125e+07	201	23.5876	5.10986
P13645	Keratin, type I cytoskeletal 10 OS=Homo sapiens GN=KRT10 PE=1 SV=6 - [K1C10_HUMAN]	15.5311	13.53	4	7	7	7	3.81312e+07	584	58.7917	5.21143
P08217	Chymotrypsin-like elastase family member 2A OS=Homo sapiens GN=CELA2A PE=1 SV=1 - [CEL2A_HUMAN]	15.1426	31.97	2	6	6	7	1.80514e+08	269	28.8694	8.45557
A0A075B6S5	Immunoglobulin kappa variable 1-27 OS=Homo sapiens GN=IGKV1-27 PE=3 SV=1 - [KV127_HUMAN]	14.9909	29.06	3	2	2	5	4.49138e+08	117	12.7034	8.29443
A0A0C4DH29	Immunoglobulin heavy variable 1-3 OS=Homo sapiens GN=IGHV1-3 PE=3 SV=1 - [HV103_HUMAN]	14.6982	22.22	3	1	2	9	1.36115e+09	117	12.9994	9.5542
P04217	Alpha-1B-glycoprotein OS=Homo sapiens GN=A1BG PE=1 SV=4 - [A1BG_HUMAN]	14.1746	16.57	2	6	6	7	5.54378e+07	495	54.2195	5.85889
A0A0A0MS15	Immunoglobulin heavy variable 3-49 OS=Homo sapiens GN=IGHV3-49 PE=3 SV=1 - [HV349_HUMAN]	13.9912	27.73	1	3	3	6	1.45687e+09	119	13.0475	8.6167
P11021	78 kDa glucose-regulated protein OS=Homo sapiens GN=HSPA5 PE=1 SV=2 - [GRP78_HUMAN]	13.7416	6.73	1	3	3	5	6.456e+07	654	72.2884	5.16064
A0A075B6K4	Immunoglobulin lambda variable 3-10 OS=Homo sapiens GN=IGLV3-10 PE=3 SV=2 - [LV310_HUMAN]	13.626	28.7	1	3	4	8	1.82318e+09	115	12.433	4.83057
P16233	Pancreatic triacylglycerol lipase OS=Homo sapiens GN=PNLIP PE=1 SV=1 - [LIPP_HUMAN]	13.4547	15.48	1	5	5	5	2.17844e+07	465	51.1243	6.72705
A0A0B4J1V6	Immunoglobulin heavy variable 3-73 OS=Homo sapiens GN=IGHV3-73 PE=3 SV=1 - [HV373_HUMAN]	12.8436	31.09	1	2	3	4	3.14997e+09	119	12.8494	9.17334
P02747	Complement C1q subcomponent subunit C OS=Homo sapiens GN=C1QC PE=1 SV=3 - [C1QC_HUMAN]	12.5419	13.88	1	3	3	4	1.84469e+08	245	25.7571	8.41162
A0A0B4J1V0	Immunoglobulin heavy variable 3-15 OS=Homo sapiens GN=IGHV3-15 PE=3 SV=1 - [HV315_HUMAN]	12.5287	31.09	1	3	4	6	3.24331e+09	119	12.9175	8.6167
Q8WWA0	Intelectin-1 OS=Homo sapiens GN=ITLN1 PE=1 SV=1 - [ITLN1_HUMAN]	12.4629	22.68	3	6	6	7	3.37047e+07	313	34.9393	6.01123
P02746	Complement C1q subcomponent subunit B OS=Homo sapiens GN=C1QB PE=1 SV=3 - [C1QB_HUMAN]	10.8965	15.02	1	3	3	3	8.97272e+07	253	26.7045	8.63135
P00747	Plasminogen OS=Homo sapiens GN=PLG PE=1 SV=2 - [PLMN_HUMAN]	10.8612	12.84	1	9	9	9	5.04355e+07	810	90.5102	7.23975
A0A075B6Q5	Immunoglobulin heavy variable 3-64 OS=Homo sapiens GN=IGHV3-64 PE=3 SV=1 - [HV364_HUMAN]	10.7525	25.42	1	2	2	3	1.42922e+08	118	12.8823	7.85498
A0A0C4DH33	Immunoglobulin heavy variable 1-24 OS=Homo sapiens GN=IGHV1-24 PE=3 SV=1 - [HV124_HUMAN]	10.3469	29.91	1	2	2	3	5.67078e+07	117	12.8162	5.16064
P01700	Immunoglobulin lambda variable 1-47 OS=Homo sapiens GN=IGLV1-47 PE=1 SV=2 - [LV147_HUMAN]	10.2962	24.79	1	1	2	5	2.29706e+09	117	12.2759	5.90967
A0A075B6S6	Immunoglobulin kappa variable 2D-30 OS=Homo sapiens GN=IGKV2D-30 PE=3 SV=1 - [KVD30_HUMAN]	10.2007	32.5	5	1	2	6	5.99216e+09	120	13.2065	7.98682
P61916-2	Isoform 2 of Epididymal secretory protein E1 OS=Homo sapiens GN=NPC2 - [NPC2_HUMAN]	10.1863	46.4	2	4	4	4	72922228	125	13.4068	8.33838
A0A087WW87	Immunoglobulin kappa variable 2-40 OS=Homo sapiens GN=IGKV2-40 PE=3 SV=2 - [KV240_HUMAN]	9.7631	28.1	5	2	3	7	3.97426e+09	121	13.3016	4.61475
P01624	Immunoglobulin kappa variable 3-15 OS=Homo sapiens GN=IGKV3-15 PE=1 SV=2 - [KV315_HUMAN]	9.53044	26.09	2	1	2	4	5.78239e+09	115	12.4882	5.18604
P02774-2	Isoform 2 of Vitamin D-binding protein OS=Homo sapiens GN=GC - [VTDB_HUMAN]	9.48452	15.34	3	4	4	4	3.21301e+07	352	39.5164	5.26221
P01599	Immunoglobulin kappa variable 1-17 OS=Homo sapiens GN=IGKV1-17 PE=1 SV=2 - [KV117_HUMAN]	9.38213	23.08	1	2	2	4	7.54913e+08	117	12.7704	8.67529
P0DP09	Immunoglobulin kappa variable 1-13 OS=Homo sapiens GN=IGKV1-13 PE=3 SV=1 - [KV113_HUMAN]	9.21092	29.06	1	2	2	3	2.91585e+08	117	12.5613	7.84033
P01594	Immunoglobulin kappa variable 1-33 OS=Homo sapiens GN=IGKV1-33 PE=1 SV=2 - [KV133_HUMAN]	9.20304	34.19	1	2	2	2	995687766	117	12.8403	4.77979
P04003	C4b-binding protein alpha chain OS=Homo sapiens GN=C4BPA PE=1 SV=2 - [C4BPA_HUMAN]	9.10075	7.54	1	4	4	4	1.09574e+08	597	66.9894	7.29834
P01721	Immunoglobulin lambda variable 6-57 OS=Homo sapiens GN=IGLV6-57 PE=1 SV=2 - [LV657_HUMAN]	9.03114	17.09	1	1	1	3	5.99653e+08	117	12.5578	4.77979
P01031	Complement C5 OS=Homo sapiens GN=C5 PE=1 SV=4 - [CO5_HUMAN]	8.82086	3.1	1	4	4	4	1.17783e+07	1676	188.186	6.52197
P01714	Immunoglobulin lambda variable 3-19 OS=Homo sapiens GN=IGLV3-19 PE=1 SV=2 - [LV319_HUMAN]	8.58816	36.61	1	3	3	5	1.52676e+09	112	12.0349	4.95752
P02763	Alpha-1-acid glycoprotein 1 OS=Homo sapiens GN=ORM1 PE=1 SV=1 - [A1AG1_HUMAN]	8.16341	15.92	1	2	3	3	9.4016e+07	201	23.4968	5.021
P01602	Immunoglobulin kappa variable 1-5 OS=Homo sapiens GN=IGKV1-5 PE=1 SV=2 - [KV105_HUMAN]	7.84641	24.79	1	2	2	3	1.64181e+09	117	12.7734	8.27979
P04004	Vitronectin OS=Homo sapiens GN=VTN PE=1 SV=1 - [VTNC_HUMAN]	7.83921	10.88	1	4	4	4	5.13286e+08	478	54.2712	5.79541
P01042-2	Isoform LMW of Kininogen-1 OS=Homo sapiens GN=KNG1 - [KNG1_HUMAN]	7.64028	9.84	3	4	4	4	5.48751e+07	427	47.8527	6.65381
A0A0B4J1Y8	Immunoglobulin lambda variable 9-49 OS=Homo sapiens GN=IGLV9-49 PE=1 SV=1 - [LV949_HUMAN]	7.02666	24.39	1	3	3	3	4.73488e+08	123	13.0155	7.28369
P15814	Immunoglobulin lambda-like polypeptide 1 OS=Homo sapiens GN=IGLL1 PE=1 SV=1 - [IGLL1_HUMAN]	7.00169	15.96	1	2	2	5	5.62375e+08	213	22.9486	10.0669
A0A0C4DH31	Immunoglobulin heavy variable 1-18 OS=Homo sapiens GN=IGHV1-18 PE=3 SV=1 - [HV118_HUMAN]	6.99984	36.75	2	3	3	6	9.78856e+07	117	12.8122	8.83643
A0A0C4DH34	Immunoglobulin heavy variable 4-28 OS=Homo sapiens GN=IGHV4-28 PE=3 SV=1 - [HV428_HUMAN]	6.90705	7.69	1	1	1	5	3.55364e+08	117	13.1157	9.29053
A0A087WSY6	Immunoglobulin kappa variable 3D-15 OS=Homo sapiens GN=IGKV3D-15 PE=3 SV=6 - [KVD15_HUMAN]	6.53255	26.09	1	1	2	3	6.42557e+08	115	12.5263	5.18604
Q14624-4	Isoform 4 of Inter-alpha-trypsin inhibitor heavy chain H4 OS=Homo sapiens GN=ITIH4 - [ITIH4_HUMAN]	6.48019	3.2	4	3	3	3	9.49531e+07	845	93.793	6.50732
A0A0B4J1U3	Immunoglobulin lambda variable 1-36 OS=Homo sapiens GN=IGLV1-36 PE=3 SV=5 - [LV136_HUMAN]	6.46327	35.9	1	2	2	2	3.19085e+08	117	12.47	4.77979
P19827	Inter-alpha-trypsin inhibitor heavy chain H1 OS=Homo sapiens GN=ITIH1 PE=1 SV=3 - [ITIH1_HUMAN]	6.41993	4.28	3	3	3	3	2.39202e+07	911	101.326	6.78564
P02776	Platelet factor 4 OS=Homo sapiens GN=PF4 PE=1 SV=2 - [PLF4_HUMAN]	6.41278	35.64	2	3	3	4	1.34483e+08	101	10.8379	8.6167
P01703	Immunoglobulin lambda variable 1-40 OS=Homo sapiens GN=IGLV1-40 PE=1 SV=2 - [LV140_HUMAN]	6.38046	38.98	1	2	2	3	2.04041e+08	118	12.2939	5.74463
P61604	10 kDa heat shock protein, mitochondrial OS=Homo sapiens GN=HSPE1 PE=1 SV=2 - [CH10_HUMAN]	6.22555	33.33	1	3	3	3	15630326	102	10.9249	8.92432
P01699	Immunoglobulin lambda variable 1-44 OS=Homo sapiens GN=IGLV1-44 PE=1 SV=2 - [LV144_HUMAN]	5.96125	38.46	1	1	2	4	7.48508e+07	117	12.1938	5.17334
A0A075B6J9	Immunoglobulin lambda variable 2-18 OS=Homo sapiens GN=IGLV2-18 PE=3 SV=2 - [LV218_HUMAN]	5.88915	24.58	1	2	2	2	2.68404e+08	118	12.404	4.81787
P01717	Immunoglobulin lambda variable 3-25 OS=Homo sapiens GN=IGLV3-25 PE=1 SV=2 - [LV325_HUMAN]	5.82205	36.61	2	1	3	7	1.60107e+09	112	12.0038	4.50049
P01709	Immunoglobulin lambda variable 2-8 OS=Homo sapiens GN=IGLV2-8 PE=1 SV=2 - [LV208_HUMAN]	5.69113	6.78	1	1	1	5	1073761552	118	12.3739	5.90967
A0A0J9YX35	Immunoglobulin heavy variable 3-64D OS=Homo sapiens GN=IGHV3-64D PE=3 SV=1 - [HV64D_HUMAN]	5.47105	18.8	1	2	2	2	7.92642e+08	117	12.8143	7.85498
A0A075B6I0	Immunoglobulin lambda variable 8-61 OS=Homo sapiens GN=IGLV8-61 PE=3 SV=7 - [LV861_HUMAN]	5.20775	14.75	1	2	2	3	875643399	122	12.8061	4.55127
P01591	Immunoglobulin J chain OS=Homo sapiens GN=JCHAIN PE=1 SV=4 - [IGJ_HUMAN]	5.12801	13.84	1	2	2	2	2.38325e+08	159	18.087	5.23682
P02748	Complement component C9 OS=Homo sapiens GN=C9 PE=1 SV=2 - [CO9_HUMAN]	5.06469	5.55	1	3	3	3	2.18237e+07	559	63.1327	5.59229
P08637	Low affinity immunoglobulin gamma Fc region receptor III-A OS=Homo sapiens GN=FCGR3A PE=1 SV=2 - [FCG3A_HUMAN]	5.0471	7.48	2	2	2	2	1.04323e+08	254	29.0707	8.07471
P63267-2	Isoform 2 of Actin, gamma-enteric smooth muscle OS=Homo sapiens GN=ACTG2 - [ACTH_HUMAN]	4.85797	10.51	11	3	3	3	3.15922e+07	333	37.0594	5.5415
A0A0A0MS14	Immunoglobulin heavy variable 1-45 OS=Homo sapiens GN=IGHV1-45 PE=3 SV=1 - [HV145_HUMAN]	4.69562	17.09	1	2	2	2	1.40863e+08	117	13.4995	9.1001
A0A075B6J1	Immunoglobulin lambda variable 5-37 OS=Homo sapiens GN=IGLV5-37 PE=3 SV=1 - [LV537_HUMAN]	4.64964	16.26	1	2	2	2	22304559	123	13.2684	4.94482
P01718	Immunoglobulin lambda variable 3-27 OS=Homo sapiens GN=IGLV3-27 PE=1 SV=2 - [LV327_HUMAN]	4.61494	32.74	2	2	3	4	2.62052e+08	113	12.1571	5.0083
P00734	Prothrombin OS=Homo sapiens GN=F2 PE=1 SV=2 - [THRB_HUMAN]	4.47434	4.02	1	2	2	2		622	69.9921	5.89697
P00367	Glutamate dehydrogenase 1, mitochondrial OS=Homo sapiens GN=GLUD1 PE=1 SV=2 - [DHE3_HUMAN]	4.34745	7.53	4	3	3	3	1.96909e+07	558	61.3592	7.79639
P00751	Complement factor B OS=Homo sapiens GN=CFB PE=1 SV=2 - [CFAB_HUMAN]	4.31568	6.94	2	5	5	5	3.53136e+07	764	85.4785	7.06396
P07478	Trypsin-2 OS=Homo sapiens GN=PRSS2 PE=1 SV=1 - [TRY2_HUMAN]	4.23984	14.17	1	3	3	3	3.90374e+07	247	26.471	4.91943
Q15485-2	Isoform 2 of Ficolin-2 OS=Homo sapiens GN=FCN2 - [FCN2_HUMAN]	4.23549	5.09	2	1	1	2	2.03958e+07	275	30.2085	6.29053
P04114	Apolipoprotein B-100 OS=Homo sapiens GN=APOB PE=1 SV=2 - [APOB_HUMAN]	4.21949	0.48	1	2	2	2	5.54382e+06	4563	515.283	7.04932
P02652	Apolipoprotein A-II OS=Homo sapiens GN=APOA2 PE=1 SV=1 - [APOA2_HUMAN]	4.11293	10	1	2	2	2	5.51411e+07	100	11.1679	6.62451
A0A075B6I9	Immunoglobulin lambda variable 7-46 OS=Homo sapiens GN=IGLV7-46 PE=3 SV=4 - [LV746_HUMAN]	4.01237	15.38	1	1	2	3	1.8564e+09	117	12.4601	7.1958
Q99895	Chymotrypsin-C OS=Homo sapiens GN=CTRC PE=1 SV=2 - [CTRC_HUMAN]	3.87603	6.34	1	2	2	2	1.91268e+07	268	29.4649	7.59131
P00736	Complement C1r subcomponent OS=Homo sapiens GN=C1R PE=1 SV=2 - [C1R_HUMAN]	3.80574	3.83	1	2	2	3	3.74009e+06	705	80.0668	6.21436
P04211	Immunoglobulin lambda variable 7-43 OS=Homo sapiens GN=IGLV7-43 PE=3 SV=2 - [LV743_HUMAN]	3.789	15.38	1	1	2	3	1.83904e+09	117	12.4431	7.03467
P01880	Immunoglobulin heavy constant delta OS=Homo sapiens GN=IGHD PE=1 SV=3 - [IGHD_HUMAN]	3.67631	4.69	2	1	1	1	1.83456e+07	384	42.3263	8.11865
P01704	Immunoglobulin lambda variable 2-14 OS=Homo sapiens GN=IGLV2-14 PE=1 SV=2 - [LV214_HUMAN]	3.43285	13.33	1	1	1	3	5.0948e+08	120	12.589	6.49365
A0A087WSZ0	Immunoglobulin kappa variable 1D-8 OS=Homo sapiens GN=IGKV1D-8 PE=3 SV=6 - [KVD08_HUMAN]	3.41782	16.24	1	1	1	2	9.30238e+07	117	12.8283	7.73779
A0A087WSX0	Immunoglobulin lambda variable 5-45 OS=Homo sapiens GN=IGLV5-45 PE=3 SV=1 - [LV545_HUMAN]	3.34685	13.82	1	1	1	1	1.29082e+08	123	13.1534	7.1958
P01715	Immunoglobulin lambda variable 3-1 OS=Homo sapiens GN=IGLV3-1 PE=1 SV=2 - [LV301_HUMAN]	3.23971	19.13	1	1	1	1	6.20951e+07	115	12.2878	4.94482
P07477	Trypsin-1 OS=Homo sapiens GN=PRSS1 PE=1 SV=1 - [TRY1_HUMAN]	3.20413	10.12	2	2	2	2	7.94801e+06	247	26.5411	6.50732
A0A0B4J1V2	Immunoglobulin heavy variable 2-26 OS=Homo sapiens GN=IGHV2-26 PE=3 SV=1 - [HV226_HUMAN]	3.19806	11.76	1	1	1	1	7.86463e+07	119	13.1737	8.29443
A0A0C4DH24	Immunoglobulin kappa variable 6-21 OS=Homo sapiens GN=IGKV6-21 PE=3 SV=1 - [KV621_HUMAN]	3.1354	10.53	1	1	1	1	78466096	114	12.4222	7.28369
A0A0G2JMI3	Immunoglobulin heavy variable 1-69-2 OS=Homo sapiens GN=IGHV1-69-2 PE=3 SV=2 - [HV692_HUMAN]	3.01728	17.09	1	1	1	1	24415848	117	12.8622	4.84326
P07602	Prosaposin OS=Homo sapiens GN=PSAP PE=1 SV=2 - [SAP_HUMAN]	2.85606	3.63	3	2	2	2	1.4516e+07	524	58.0739	5.17334
A0A0A0MT36	Immunoglobulin kappa variable 6D-21 OS=Homo sapiens GN=IGKV6D-21 PE=3 SV=1 - [KVD21_HUMAN]	2.81825	10.53	1	1	1	1	9.84019e+07	114	12.3322	7.28369
P04430	Immunoglobulin kappa variable 1-16 OS=Homo sapiens GN=IGKV1-16 PE=1 SV=2 - [KV116_HUMAN]	2.81417	13.68	1	1	1	1	1.02394e+08	117	12.6102	8.1626
P06396-2	Isoform 2 of Gelsolin OS=Homo sapiens GN=GSN - [GELS_HUMAN]	2.50493	1.5	4	1	1	1	2.42685e+07	731	80.5905	5.84619
A0A0G2JS06	Immunoglobulin lambda variable 5-39 OS=Homo sapiens GN=IGLV5-39 PE=3 SV=1 - [LV539_HUMAN]	2.46934	7.32	1	1	1	1	363295936	123	13.3857	8.63135
P08861	Chymotrypsin-like elastase family member 3B OS=Homo sapiens GN=CELA3B PE=1 SV=3 - [CEL3B_HUMAN]	2.39532	8.15	1	1	2	2	200033030	270	29.2444	6.27783
P09093	Chymotrypsin-like elastase family member 3A OS=Homo sapiens GN=CELA3A PE=1 SV=3 - [CEL3A_HUMAN]	2.39532	8.52	1	1	2	2	1.31442e+08	270	29.4696	6.90283
P02766	Transthyretin OS=Homo sapiens GN=TTR PE=1 SV=1 - [TTHY_HUMAN]	2.39231	8.84	1	1	1	1	1.98547e+07	147	15.877	5.75732
Q96PD5	N-acetylmuramoyl-L-alanine amidase OS=Homo sapiens GN=PGLYRP2 PE=1 SV=1 - [PGRP2_HUMAN]	2.38735	2.26	2	1	1	1	1.51566e+07	576	62.1779	7.54736
P49908	Selenoprotein P OS=Homo sapiens GN=SELENOP PE=1 SV=3 - [SEPP1_HUMAN]	2.30209	2.62	1	1	1	1	2.28757e+07	381	43.1563	7.86963
O95267-4	Isoform 4 of RAS guanyl-releasing protein 1 OS=Homo sapiens GN=RASGRP1 - [GRP1_HUMAN]	2.29309	2.7	5	1	1	1	229746867	481	55.0649	7.00537
P02753	Retinol-binding protein 4 OS=Homo sapiens GN=RBP4 PE=1 SV=3 - [RET4_HUMAN]	2.2821	10.45	1	2	2	2	2.02763e+07	201	22.9953	6.07471
Q03591	Complement factor H-related protein 1 OS=Homo sapiens GN=CFHR1 PE=1 SV=2 - [FHR1_HUMAN]	2.23706	3.94	2	1	1	1	1.14162e+07	330	37.626	7.38623
P02743	Serum amyloid P-component OS=Homo sapiens GN=APCS PE=1 SV=2 - [SAMP_HUMAN]	2.18311	5.83	1	1	1	1	2.06659e+07	223	25.3711	6.53662
P01009-2	Isoform 2 of Alpha-1-antitrypsin OS=Homo sapiens GN=SERPINA1 - [A1AT_HUMAN]	2.17622	4.74	3	2	2	2		359	40.2376	5.46533
P02765	Alpha-2-HS-glycoprotein OS=Homo sapiens GN=AHSG PE=1 SV=1 - [FETUA_HUMAN]	2.17018	1.91	1	1	1	1	3.57595e+07	367	39.2997	5.71924
P05156	Complement factor I OS=Homo sapiens GN=CFI PE=1 SV=2 - [CFAI_HUMAN]	2.12021	1.72	1	1	1	1		583	65.7066	7.50342
Q8TB22-4	Isoform 4 of Spermatogenesis-associated protein 20 OS=Homo sapiens GN=SPATA20 - [SPT20_HUMAN]	2.10767	1.73	4	1	1	1	3.27909e+07	521	58.4262	8.00146
Q13103	Secreted phosphoprotein 24 OS=Homo sapiens GN=SPP2 PE=1 SV=1 - [SPP24_HUMAN]	2.08229	5.69	1	1	1	1	1.21445e+07	211	24.3218	8.32373
P16383-4	Isoform 4 of GC-rich sequence DNA-binding factor 2 OS=Homo sapiens GN=GCFC2 - [GCFC2_HUMAN]	2.07921	7.09	1	1	1	1	5.68918e+08	254	28.0317	5.18604
Q9Y624-2	Isoform 2 of Junctional adhesion molecule A OS=Homo sapiens GN=F11R - [JAM1_HUMAN]	2.06904	4.8	2	1	1	1	2.99618e+07	250	27.1908	8.42627
P02654	Apolipoprotein C-I OS=Homo sapiens GN=APOC1 PE=1 SV=1 - [APOC1_HUMAN]	2.00742	24.1	1	2	2	2	3.33046e+07	83	9.32609	8.47021
P10643	Complement component C7 OS=Homo sapiens GN=C7 PE=1 SV=2 - [CO7_HUMAN]	1.9625	2.25	1	2	2	2	6.70557e+06	843	93.4573	6.48096
P02775	Platelet basic protein OS=Homo sapiens GN=PPBP PE=1 SV=3 - [CXCL7_HUMAN]	1.92128	14.84	1	2	2	2	1.94581e+07	128	13.8854	8.79248
P25311	Zinc-alpha-2-glycoprotein OS=Homo sapiens GN=AZGP1 PE=1 SV=2 - [ZA2G_HUMAN]	1.91844	3.36	1	1	1	1		298	34.2371	6.04932
P02745	Complement C1q subcomponent subunit A OS=Homo sapiens GN=C1QA PE=1 SV=2 - [C1QA_HUMAN]	1.91198	4.49	1	2	2	2	8.01481e+07	245	26.0002	9.11475
P07357	Complement component C8 alpha chain OS=Homo sapiens GN=C8A PE=1 SV=2 - [CO8A_HUMAN]	1.88715	1.71	1	1	1	1	7001550	584	65.121	6.46826
P02533	Keratin, type I cytoskeletal 14 OS=Homo sapiens GN=KRT14 PE=1 SV=4 - [K1C14_HUMAN]	1.82716	1.91	1	1	1	1	8.80517e+06	472	51.5294	5.16064
P01706	Immunoglobulin lambda variable 2-11 OS=Homo sapiens GN=IGLV2-11 PE=1 SV=2 - [LV211_HUMAN]	1.79983	6.72	1	1	1	1	3.35254e+08	119	12.636	7.23975
P12755	Ski oncogene OS=Homo sapiens GN=SKI PE=1 SV=1 - [SKI_HUMAN]	1.78128	1.92	1	1	1	1	9.64237e+06	728	79.9549	7.62061
P01008	Antithrombin-III OS=Homo sapiens GN=SERPINC1 PE=1 SV=1 - [ANT3_HUMAN]	1.61384	2.37	1	1	1	1	18899449	464	52.5689	6.7124
O95445-2	Isoform 2 of Apolipoprotein M OS=Homo sapiens GN=APOM - [APOM_HUMAN]	1.60252	7.76	2	1	1	1		116	13.0424	7.75244
P02649	Apolipoprotein E OS=Homo sapiens GN=APOE PE=1 SV=1 - [APOE_HUMAN]	0	3.47	1	1	1	1		317	36.1318	5.73193
O00338	Sulfotransferase 1C2 OS=Homo sapiens GN=SULT1C2 PE=1 SV=1 - [ST1C2_HUMAN]	0	4.05	2	1	1	1	1.66922e+07	296	34.8574	7.51807
O43566	Regulator of G-protein signaling 14 OS=Homo sapiens GN=RGS14 PE=1 SV=4 - [RGS14_HUMAN]	0	2.83	1	1	1	1	3.7517e+07	566	61.409	8.19189
P05090	Apolipoprotein D OS=Homo sapiens GN=APOD PE=1 SV=1 - [APOD_HUMAN]	0	5.82	1	1	1	1	5.00302e+07	189	21.2618	5.14795
P07225	Vitamin K-dependent protein S OS=Homo sapiens GN=PROS1 PE=1 SV=1 - [PROS_HUMAN]	0	1.48	1	1	1	1	1.64729e+07	676	75.0739	5.66846
P07358	Complement component C8 beta chain OS=Homo sapiens GN=C8B PE=1 SV=3 - [CO8B_HUMAN]	0	1.35	1	1	1	1	3.74743e+06	591	67.0035	8.1333
P19835-2	Isoform Short of Bile salt-activated lipase OS=Homo sapiens GN=CEL - [CEL_HUMAN]	0	1.75	2	1	1	1	3.13936e+06	687	71.789	5.03369
P23284	Peptidyl-prolyl cis-trans isomerase B OS=Homo sapiens GN=PPIB PE=1 SV=2 - [PPIB_HUMAN]	0	3.7	1	1	1	1	6.40367e+06	216	23.7275	9.40771
P58335-2	Isoform 2 of Anthrax toxin receptor 2 OS=Homo sapiens GN=ANTXR2 - [ANTR2_HUMAN]	0	2.33	3	1	1	1		386	42.8657	8.36768
Q15582	Transforming growth factor-beta-induced protein ig-h3 OS=Homo sapiens GN=TGFBI PE=1 SV=1 - [BGH3_HUMAN]	0	1.76	1	1	1	1	8930697	683	74.634	7.7085
Q6NT04-2	Isoform 2 of Tigger transposable element-derived protein 7 OS=Homo sapiens GN=TIGD7 - [TIGD7_HUMAN]	0	1.57	2	1	1	1	7.90245e+06	511	58.8781	7.92822
Q7KZF4	Staphylococcal nuclease domain-containing protein 1 OS=Homo sapiens GN=SND1 PE=1 SV=1 - [SND1_HUMAN]	0	1.1	1	1	1	1	9.4369e+07	910	101.934	7.1665
Q7Z5J8-2	Isoform 2 of Ankyrin and armadillo repeat-containing protein OS=Homo sapiens GN=ANKAR - [ANKAR_HUMAN]	0	1.48	2	1	1	1	10047628	1080	122.647	7.81104
Q86UZ6	Zinc finger and BTB domain-containing protein 46 OS=Homo sapiens GN=ZBTB46 PE=1 SV=2 - [ZBT46_HUMAN]	0	2.38	1	1	1	1	4.10199e+07	589	64.0432	5.87158
Q9HBA0-6	Isoform 6 of Transient receptor potential cation channel subfamily V member 4 OS=Homo sapiens GN=TRPV4 - [TRPV4_HUMAN]	0	4.84	6	1	1	2		764	85.8292	8.17725
Q9HCU9	Breast cancer metastasis-suppressor 1 OS=Homo sapiens GN=BRMS1 PE=1 SV=1 - [BRMS1_HUMAN]	0	5.69	1	1	1	1	40337390	246	28.443	4.7417
A0A0C4DH68	Immunoglobulin kappa variable 2-24 OS=Homo sapiens GN=IGKV2-24 PE=3 SV=1 - [KV224_HUMAN]	0	10.83	1	1	1	1	1.28562e+09	120	13.0706	8.52881
